# Supplementary material for: Headspace Gas Chromatography-Mass Spectrometry for Volatile Components Analysis in Ipomoea Cairica (L.) Sweet Leaves: Natural Deep Eutectic Solvents as Green Extraction and Dilution Matrix
Source: PubMed Central journal article supplement (PMC6617084; doi:10.3390/foods8060205), 2019-06-11
Supplement: foods-08-00205-s001.pdf [file foods-08-00205-s001.pdf]

# Headspace gas chromatography-mass spectrometry for volatile components analysis in *Ipomoea cairica* (L.) Sweet leaves: Natural deep eutectic solvents as green extraction and dilution matrix

Wei Zhang and Xianrui Liang \*

Collaborative Innovation Center of Yangtze River Delta Region Green Pharmaceuticals,  
College of Pharmaceutical Sciences, Zhejiang University of Technology, Hangzhou 310014, China;  
liangxrivicky@zjut.edu.cn

\* Correspondence: liangxrivicky@zjut.edu.cn; Tel.: +86-571-8832-0420

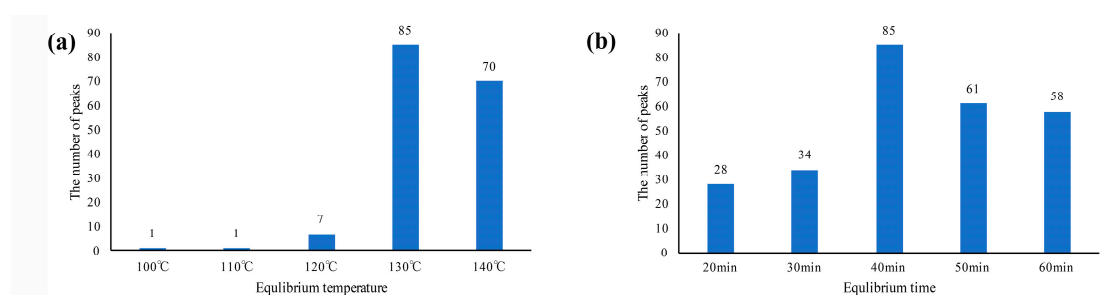

**Figure S1.** Comparison of the peak numbers obtained from different conditions: (a) different equilibrium temperatures; (b) different equilibrium time.

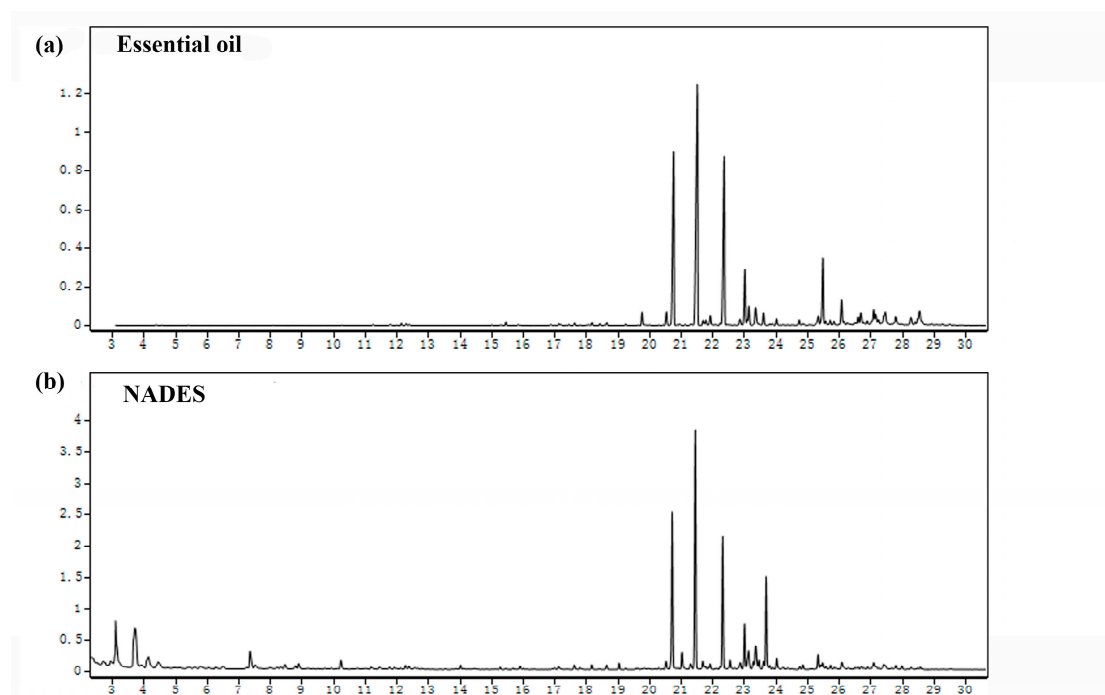

**Figure S2.** The comparison of the total ion chromatograms of ICS samples: (a) the ICS essential oil ; (b) the ICS powder in NADES -2 containing 15% water.
